# Supplementary material
Source: publisher site journal article supplement (https://www.dovepress.com/article/402610)
Supplement: Supplementary file 1 [file get_supplementary_file.php]

**Annex 1 Simulation Scenarios**

Simulation goal

- Equip students with the knowledge and skill required to assess, classify and provide basic care expected for pregnant mothers by addressing FANC goals (1st visit).
  - Establish rapport
  - Make sure the woman is pregnant
  - Collect evidence to determine to which category shall the women classified
  - Assess pregnancy condition (early detection and treatment of complication)
    - Health of mother
      - History (Classifying form, Integrated chart record, additional obstetrics history)
      - P/E (GA,V/S,HEENT,Chest,Breast,Abdomen,GU and pothers based on indication
    - Fetal condition
  - Laboratory investigation
    - Urine (special emphasis for bacteria and protein)
    - Blood (ABO/Rh, RPR,Hg,HIV,HepBsurAg,
    - Stool(parasites)
    - U/S
    - Additional based on indication
  - Assessment
    - Management of any complain
  - Disease prevention
    - TT, Iron/folic,Iodine,ITN,HIV
  - Health promotion
    - How to recognize danger
    - Nutrition
    - Hygiene and infection prevention
    - Avoidance of risky behavior
    - Breast feeding
  - Birth preparedness
    - Money,supporter,skilled attendants, blood donors, stuffs required, transportation, sign of labour

Close up and appointments

Case 1-HEG

**ID- abebech bekele, 23, divorced, mizan, merchant,**

**C/C-** Nausea and vomiting for 7 days

**DDx-** HEG, Acute pancreatitis, Pyelonephritis

**HPI-**

**G-II, para-I, abortion 1, LNMP 13/3/2012, px-unplanned, unsuported & unwanted**

- Nausea and vomiting for 7 days at least 10 times at day time
- Nausea and vomiting is more common at day time
- Has irregular pattern, exacerbated by feeding and relived by rest/sleeping
- Has a worrying family problem?
- The woman has no abdominal pain, no flank pain, no diarrhea no jaundice
- No fever
- History of twin pregnancy

**GYNY-**

- FAMILY PLANING – DEPO FOR 3 YEARS
- Treated for bacterial vaginosis

**Personal, family, social**

- No bad habits,Low income, no support
- Able to read and write

**PE-**

- GA-weak looking
- v/s-BP (85/50), PR (100), RR (26), To (37.5)
- Wt (before 60 NV), (56 after NV)
- HEENT-dry mucus membrane, increased skin turgor, distended neck vein,
- LGS-no enlarged thyroid gland
- GENITOURINARY- no CVAT
- INTEGUMENTARY- increased skin turgor, dray skin, paculopapular rash

**Laboratory-**

- Urinalysis (ketones +3 & specific gravity 1.5)
- Serum electrolyte (K+-2mEq/L, Cl- -75mmol/L)
- Liver enzyme (ALT-50IU/L,AST-35IU/L)
- RFT(serum creatnine-1.6mg/dl)
- Ultrasound (confirmed intrauterine normal pregnancy)

**Diagnosis:** HEG, hypokalemia, hypochloremia, acute kidney injury

**Management**

1. Acute kidney injury-**consult/refer**
2. Regarding HEG & e/l disturbance-**manage as follow**

- Goal:
  - Reduce symptoms
  - Correct complications
  - Avoid/minimize/manage risk factors
- Pharmacologic
  - Antiemetic-metoclopromide 5-10mg po tid/promethazine 12.5 mg IM QID
  - Pyradoxin -25mg/po tid/qid
  - If persisted/methyl predenselon16mgtid/2-3d then taper for 2 weeks /chlorpromazine 25-50 mg qid
  - Kcl-to make 40meq/l
  - RL/NS (vitbcomplex, dex40%, kcl)
- Non-pharmacologic
  - Avoidance of triggering
  - Acupressure
  - Quiet and clean room
- Diet
  - NPO if ketone is high
  - Banana, rice, toast, protein, cracker, ginger as tolerated
  - Avoid fatty and spicy foods
  - Acupressure

**Discuss Treatment monitoring (ketone, e/t, v/s etc.)**

- **Key focused points after simulation. Please give a brief feedback by addressing the following points**
  - Did they follow principles of communication with the patient?
  - Does their interaction with peer is professional?
  - Did they complete the history taking format?
  - Did they hypothesize differential diagnosis?
  - Did they properly explore and narrate signs and symptoms?
  - Did they attempted to assess any complication related to the problem
  - Did they attempt to identify any risk factors?
  - Did they identify parts to be physically examined?
  - Did they plan all laboratories investigation based on?
    - Rule out
    - Detect complication
    - Confirm mostly suspected disease
  - Did they establish the correct diagnosis?
    - Could they justify their evidence?
    - Could they tell how they rule out differential diagnosis?
  - Did they formulate proper management plan by stating the goal?
  - Did they have pharmacologic and non-pharmacologic management?

Case2-Pneumonia

ID-Bereket Mulatu, Male, 9 months, from Mizan,

C/C- cough for 05 days

DDx- Pneumonia, pertussis, aspiration

S/S-

- The cough started as a common cold, progressively become sever, the cough is not productive, and repetitive
- The cough was aggravated at night time
- Two days after the onset of cough the child started to experience difficulty of breathing (nasal flaring, fast breathing, granting, intercostal retraction)
- The baby has also fever
- The baby is irritable and has poor appetite
- The baby has no exposure to children around or family member with cough history
- The child has uncompleted history of immunization
- No family history of Asthma or other known hereditary disease

P/E-

- GA- Severely sick looking
- V/S-RR-55, To-38.5oc, PR-100
- Anthropometric measurement (wt.7 kg ht. 65 cm) Weight/age, Height/age, weight/height
- HEENT-Nasal flaring, dried lip, distended neck vessels, bluish lip
- Chest –Auscultation- crackled sound

Investigation-

- Pulse Oximetry- 85% saturation
- CBC-total leukocytes 20x109, (dwbc count N-12x109, others are in normal range)
- ABG to confirm complication
- X-ray
- Serum Chemistry

Diagnosis-

- Sever Pneumonia
- Hypoxemia
- Fever

Management-

- Objective
- Alleviate symptoms
- Prevent respiratory failure
- Prevent complication
- Treat the disease
- Pharmacologic treatment
- Fever-Paracetamol 10-15mg/kg P.O up to QID/ day
- Hypoxemia- Oxygen through Nasal cather or nasal prong at a rate of 1-2l/min. Continue oxygen until the saturation is above 90% while monitoring every 3 hours. If it is above discontinue and check the saturation after 30 minutes then decide accordingly.
- Administer fluid- calculate based on Kg
- Pneumonia- Antibiotic (Ampicillin 50mg/kg IM QID/day and Gentamycin 7.5mg/kg IM once/ day) for 05 days. If the child gets well then treat with oral amoxicillin 125mg/5ml po TID for 5 days)
- Non-pharmacologic
  - Soothe the throat; relieve the cough with a safe remedy
    - Safe remedies to recommend include; (breast milk, home fluids such as tea with honey, fruit juices), fluid, feeding and adherence to treatment)

**Feedback after simulation**

**As this is the first simulation provide detailed feedback based on the following key points.**

**Start and close your feedback by emphasizing activities that have gone okay and at the middle provide your feedback by going through the following point bullet-by-bullet**

- Did they completed pediatrics history taking format?
- Did they establish differential diagnosis?
- Did they attempted to either rule in or rule out differential diagnosis
- In history
  - did they properly communicate with the patient?
  - did they properly explore sign and symptoms of the problem in such a way that it can give a clue about the development and progression of the problems?
  - did they explore risk factors?
  - did they explore any evidence of complication?
- On physical examination
  - Did they identified proper area to be examined?
  - Did they explained how to examine and identify abnormalities
  - Did they conduct the examination for rule in/out and identify complication?
- On laboratory
  - Did they identified what to send and why
  - Did they able to interpret
- Diagnosis
  - Did they reach at plausible diagnosis?
  - Could they justify their evidence for the diagnosis?
- Management
  - Did they formulate proper management plan?
  - What was their pharmacologic management
  - What was their non-pharmacologic management
- How does their communication go with their peer?
